# Supplementary material for: The Mycobacterium tuberculosis Rv2745c Plays an Important Role in Responding to Redox Stress
Source: PubMed Central journal article supplement (PMC3976341; doi:10.1371/journal.pone.0093604), 2014-04-04
Supplement: pone.0093604.s003.pdf [file pone.0093604.s003.pdf]

Supplemental Table 1. Primer Sequences

| Primer                | Sequence (5' to 3')                 |
|-----------------------|-------------------------------------|
| Mtb Rv2745c Fwd       | 5' - GCATGCGACGATTGCGAGGTGGACAA -3' |
| Mtb Rv2745c Rev       | 5' - GGCCTTAATTAATTAGGCCAGCGCCA -3' |
| Hyg <sup>r</sup> Fwd  | 5' - CCATTCCGAGGTCTTCCCgGAACTGC -3' |
| Hyg <sup>r</sup> Rev  | 5' - CCTCGAACACCTCGAAGTCGTGCAGC -3' |
| Mtb sigA Fwd RTPCR    | 5' - CCTGGGAAACTGGGTCTAATAC - 3'    |
| Mtb sigA Rev RTPCR    | 5' - CTCATCCCACACCGCTAAAG - 3'      |
| Mtb Rv2745c Fwd RTPCR | 5' - CCTCGGGTATCTGTCCGAGAT -3'      |
| Mtb Rv2745c Rev RTPCR | 5' - AGCTGCAGAGCCGTACAAATC - 3'     |
| Mtb Rv2744c Fwd RTPCR | 5'- TCTCCAATTGACGCTGGTTACCGA -3'    |
| Mtb Rv2744c Rev RTPCR | 5'- CAAGGTGCAGATTCAACAGGCCAT -3'    |
| Mtb Rv2743c Fwd RTPCR | 5'- GCGGTGACCATTTGTTGTAAGTGA -3'    |
| Mtb Rv2743c Rev RTPCR | 5'- TCGTATCTGGTGCCGACCATCAA -3'     |
| Mtb sigH RTPCR Fwd    | 5'- GCCTATGCGGGATTTGTT -3'          |
| Mtb sigH RTPCR Rev    | 5'- GGTGTTGGTCAGTATCCGGTAGA -3'     |
| Mtb sigE RTPCR Fwd    | 5'- ATGGAACTCCTCGGCGGA -3'          |
| Mtb sigE RTPCR Rev    | 5'- CAATTGGTCAGACGGCTCCA -3'        |
| Mtb moeB1 Fwd RTPCR   | 5' -CGGCGGCCAGATACAATAA - 3'        |
| Mtb moeB1 Rev RTPCR   | 5' - AGCCGCCATCTCATCATT - 3'        |
| Mtb MT3140 Fwd RTPCR  | 5' - TGTGTCGATGTCTTCGTTGTAG - 3'    |
| Mtb MT3140 Rev RTPCR  | 5' - GTCGTTCAACCGCCAGAT - 3'        |
| Mtb trxB1 Fwd RTPCR   | 5' - GACATGGTGCTCGTCGATTAT - 3'     |
| Mtb trxB1 Rev RTPCR   | 5' - CAAGCTCTCGTTCGGCTT - 3'        |
| Mtb mec+ Fwd RTPCR    | 5' -GGCATATCCCGATGACCAAT - 3'       |
| Mtb mec+ Rev RTPCR    | 5' - GCAGTGTGCGAGTGATAGAT - 3'      |
| Mtb clpP1 Fwd RTPCR   | 5' - AAACCGTATTCCAGGGCTTC - 3'      |
| Mtb clpP1 Rev RTPCR   | 5' - CGCCGTGATCAAGAAAGAAATG - 3'    |
| Mtb clpC1 Fwd RTPCR   | 5' -TGCCCAGATTGGACGTAAAG - 3'       |
| Mtb clpC1 Rev RTPCR   | 5' - CGCATCAGGAGATCTACAACAG - 3'    |
| Mtb trxB2 Fwd RTPCR   | 5' - CTTGAGGGCACGTCTTT - 3'         |
| Mtb trxB2 Rev RTPCR   | 5' - CGCATCTCATCCATCAACTCT - 3'     |

| Primer                | Sequence (5' to 3')              |
|-----------------------|----------------------------------|
| Mtb cysN Fwd RTPCR    | 5' - CATATCAGCGGCCCAAGAA - 3'    |
| Mtb cysN Rev RTPCR    | 5' - ATGACTCCAACAGGTCGATAAC - 3' |
| Mtb cysM Fwd RTPCR    | 5' - AACTGACCGCGCGATATTC - 3'    |
| Mtb cysM Rev RTPCR    | 5' - TTGAGATGCCCGCAAAGA - 3'     |
| Mtb moaC2 Fwd RTPCR   | 5' - CCGTCTACCTTGAGGATGATTT - 3' |
| Mtb moaC2 Rev RTPCR   | 5' - GGTGGCATAGCGGAATAAGA - 3'   |
| Mtb dnaK Fwd RTPCR    | 5' - CCTGAAGACACGCTGAACAA - 3'   |
| Mtb dnaK Rev RTPCR    | 5' - CCGACTTGATGGCCGAAATA - 3'   |
| Mtb clpB Fwd RTPCR    | 5' - TCGGCCAACTTCTCTTTCTG - 3'   |
| Mtb clpB Rev RTPCR    | 5' - ATGGCGCTGTCCAAAGAA - 3'     |
| Mtb kdpE Fwd RTPCR    | 5' - CCAGATCGACGGTGAATGAA - 3'   |
| Mtb kdpE Rev RTPCR    | 5' - TGGAATGGACGAGTTTCTGG - 3'   |
| Mtb hspR Fwd RTPCR    | 5' - GCGTACCTACGATCGTCTTG - 3'   |
| Mtb hspR Rev RTPCR    | 5' - CGACGTCATGCAGGGAATAG - 3'   |
| Mtb Rv3220c Fwd RTPCR | 5' - CCGTCTGCAGGTTGTTCTTA - 3'   |
| Mtb Rv3220c Rev RTPCR | 5' - ATATTGATCCGCGACGTGAC - 3'   |
| Mtb rshA Fwd RTPCR    | 5' - CCCTGCTTGACGGTGAAT - 3'     |
| Mtb rshA Rev RTPCR    | 5' - GTTCCTCGAGCCCGTAATG - 3'    |
| Mtb rseA Fwd RTPCR    | 5' - AGCACGTTGCTCGGATTAC - 3'    |
| Mtb rseA Rev RTPCR    | 5' - GAACCTCCAGACGAACCTTTAG - 3' |
